# Supplementary material for: Effects of prey density and flow speed on plankton feeding by garden eels: a flume study
Source: Oxford University Press journal article supplement (doi:10.1242/jeb.243655), 2022-03-22
Supplement: jeb243655supp.pdf [file jeb243655supp.pdf]

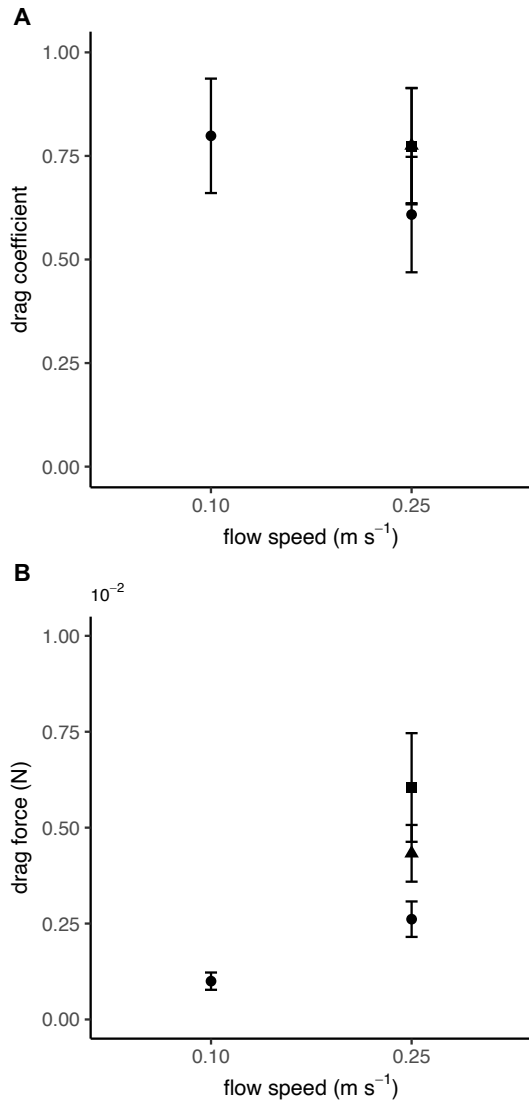

**Fig. S1. Drag coefficient and drag force.** Data for each individual were averaged from ten frames at each flow speed. Values are means  $\pm$  s.d. among individuals ( $n=3$  individuals). Circles are from experimental measurements. Squares simulate values at  $0.25 \text{ m s}^{-1}$  assuming the length and the posture are the same as those at  $0.10 \text{ m s}^{-1}$ . Triangles simulate values at  $0.25 \text{ m s}^{-1}$  assuming the posture remains the same as that at  $0.10 \text{ m s}^{-1}$  while maintaining the same exposed length at  $0.25 \text{ m s}^{-1}$ .

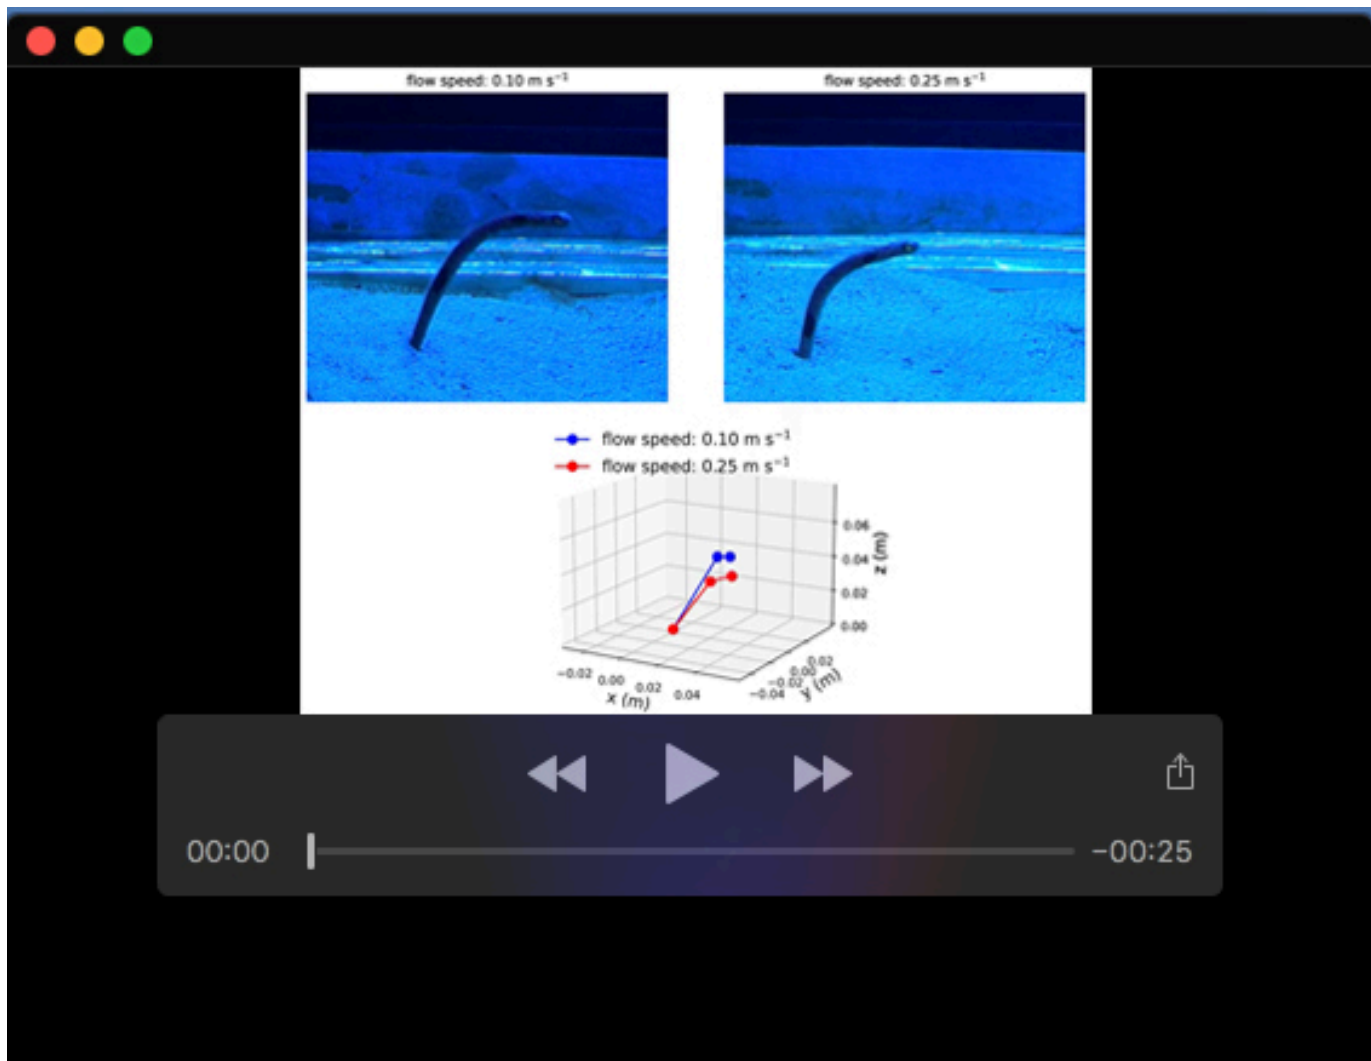

**Movie 1. 3D reconstructed garden eel movement.** Upper left and right panels show the videos taken during experiments at flow speeds of 0.10 and 0.25 m s<sup>-1</sup>, respectively. Blue and red lines in bottom panel show the corresponding 3D reconstructed eel movements at flow speeds of 0.10 and 0.25 m s<sup>-1</sup>, respectively.
